# Supplementary material
Source: publisher figshare collection journal article supplement (https://tandf.figshare.com/ndownloader/files/17810132)
Supplement: Supplementary file 1 [file 17810132]

**Supplemental Table 1**. Full text of scenarios

| Second Person Perspective  Prescriptive Violations | Third Person Perspective  Prescriptive Violations |
| --- | --- |
| Tom is running to catch the bus which only leaves every hour.  In front of Tom you are carrying two grocery bags which tear, and their contents spill all over the sidewalk.  Besides Tom no one else is around to help.  How permissible is it for Tom to catch the bus without helping you? | Tom is running to catch the bus which only leaves every hour.  In front of Tom someone is carrying two grocery bags which tear, and their contents spill all over the sidewalk.  Besides Tom no one else is around to help.  How permissible is it for Tom to catch the bus without helping them? |
| Mark wants to sell his old car.  He knows that the car's engine will need serious repairs pretty soon.  You do not notice the problem, but want to buy the car right away and offer to pay in cash.  How permissible is it for Mark to sell the car without mentioning the engine problem? | Mark wants to sell his old car.  He knows that the car's engine will need serious repairs pretty soon.  Someone who does not notice the problem wants to buy the car right away and offers to pay in cash.  How permissible is it for Mark to sell the car without mentioning the engine problem? |
| Scott is taking the subway train home and is very tired.  At the next stop you get on the train with crutches.  All of the seats are taken.  How permissible is it for Scott to stay in his seat? | Scott is taking the subway train home and is very tired.  At the next stop someone with crutches gets on the train.  All of the seats are taken.  How permissible is it for Scott to stay in his seat? |
| Patricia is your coworker and goes to buy a candy bar from a vending machine.  The machine mistakenly gives her two.  She knows that you would also like a candy bar, but you didn't ask for one.  How permissible is it for Patricia to keep both candy bars? | Patricia goes to buy a candy bar from a vending machine.  The machine mistakenly gives her two.  She knows that her coworker would also like a candy bar, but didn't ask for one.  How permissible is it for Patricia to keep both candy bars? |
| You gave your friend, Sheila, money to buy tickets for a show.  However, Sheila forgot.  She could say that the show was sold out so that you won't get mad.  How permissible is it for Sheila to say the show was sold out? | Sheila's friend gave her money to buy tickets for a show.  However, Sheila forgot.  She could say that the show was sold out so that her friend won't get mad.  How permissible is it for Sheila to say the show was sold out? |
| **Supplemental Table 1** (continued). | |
| Second Person Perspective  Proscriptive violations | Third Person Perspective  Proscriptive violations |
| Andrea is taking the final exam for an important class and does not know the answers to several problems.  However, Andrea is sitting next to you, the best student in class.  Andrea can clearly see your answers.  How permissible is it for Andrea to copy your answers? | Andrea is taking the final exam for an important class and does not know the answers to several problems.  However, Andrea is sitting next to the best student in class.  Andrea can clearly see the other student's answers.  How permissible is it for Andrea to copy the other student's answers? |
| Chris is in a hurry to get to a lunch meeting.  Chris gets to a crowded intersection as the crosswalk signal is counting down.  Chris can make it by pushing you out of the way.  How permissible is it for Chris to push you out of the way? | Chris is in a hurry to get to a lunch meeting.  Chris gets to a crowded intersection as the crosswalk signal is counting down.  Chris can make it by pushing someone out of the way.  How permissible is it for Chris to push them out of the way? |
| One of your friends is visiting your house for the first time.  There are several pictures of your family members on the walls.  Your friend thinks your mother is particularly ugly.  How permissible is it for your friend to tell you they think your mother is ugly? | Dana is visiting a friend's house for the first time.  There are several pictures of family members on the walls.  Dana thinks her friend's mother is particularly ugly.  How permissible is it for Dana to say she thinks their mother is ugly? |
| You and your friend, Justin, want to buy a brand-new computer game.  Justin promises to buy each of you a copy of the game.  However, when he gets to the store, there is only one game left.  How permissible is it for Justin to buy the game for himself? | Justin and his friend want to buy a brand-new computer game.  Justin promises to buy each of them a copy of the game.  However, when he gets to the store, there is only one game left.  How permissible is it for Justin to buy the game for himself? |
| Melanie is texting on her phone while walking down the street.  She is not paying attention to where she is going and bumps into you.  She drops her phone and the screen cracks.  How permissible is it for Melanie to yell at you? | Melanie is texting on her phone while walking down the street.  She is not paying attention to where she is going and bumps into someone.  She drops her phone and the screen cracks.  How permissible is it for Melanie to yell at the person? |

**Supplemental Table 2. Means, standard deviations, and correlations amongst dispositional measures in Study 1.**

|  | RS | PS | JS-Other | JS-Self | IRI-EC | IRI-PT | IRI-PD |
| --- | --- | --- | --- | --- | --- | --- | --- |
| RS | - |  |  |  |  |  |  |
| PS | -0.03 | - |  |  |  |  |  |
| JS-Other | -0.06 | 0.33 | - |  |  |  |  |
| JS-Self | 0.29 | 0.37 | 0.44 | - |  |  |  |
| IRI-EC | -0.20 | 0.04 | 0.34 | -0.13 | - |  |  |
| IRI-PT | -0.01 | -0.05 | 0.34 | 0.02 | 0.50 | - |  |
| IRI-PD | 0.00 | 0.57 | 0.32 | 0.43 | 0.03 | -0.07 | - |
| Mean | 4.33 | 6.94 | 3.68 | 3.65 | 26.14 | 24.11 | 18.22 |
| SD | 2.40 | 4.59 | 0.96 | 1.17 | 5.88 | 4.18 | 6.19 |

RS: reward sensitivity; PS: punishment sensitivity; IRI-EC: empathic concern; IRI-PT: perspective-taking; IRI-PD: personal distress.

**Supplemental Table 3. Parameters for hierarchical linear models in Study 1 including outliers**

|  | Model 4 |
| --- | --- |
| Fixed | β (SE) |
| Age | 0.05 (0.02)* |
| Gender | 0.03 (0.02) |
| SES | 0.04 (0.02) t |
| Type | 0.21 (0.20) |
| Perspective | 0.05 (0.02)* |
| PS | -0.02 (0.03) |
| RS | 0.03 (0.03) |
| JS-Other | 0.08 (0.03)* |
| JS-Self | -0.06 (0.03)* |
| IRI-EC | 0.12 (0.03)*** |
| IRI-PT | -0.01 (0.03) |
| IRI-PD | 0.03 (0.03) |
| Type*PS | 0.00 (0.02) |
| Type*RS | -0.07 (0.02)*** |
| Type*JS-Other | -0.08 (0.02)*** |
| Type*JS-Self | 0.08 (0.02)*** |
| Random | Variance |
| Participant | 0.33 |
| Scenario | 1.69 |
| Residual | 2.18 |

Standardized weights and errors for fixed effect coefficients. RS: reward sensitivity; PS: punishment sensitivity; IRI-EC: empathic concern; IRI-PT: perspective-taking; IRI-PD: personal distress.

t *p*<.1, * *p*<.05, **** *p*<.01, *** *p*<.001.

**Supplemental Table 4: Means, standard deviations, and correlations amongst dispositional measures in Study 2.**

|  | RS | PS | JS-Other | JS-Self | IRI-EC | IRI-PT | IRI-PD |
| --- | --- | --- | --- | --- | --- | --- | --- |
| RS | - |  |  |  |  |  |  |
| PS | 0.05 | - |  |  |  |  |  |
| JS-Other | -0.01 | 0.29 | - |  |  |  |  |
| JS-Self | 0.32 | 0.40 | 0.49 | - |  |  |  |
| IRI-EC | -0.23 | -0.01 | 0.40 | -0.05 | - |  |  |
| IRI-PT | -0.06 | 0.03 | 0.25 | 0.00 | 0.45 | - |  |
| IRI-PD | 0.06 | 0.52 | 0.21 | 0.33 | -0.10 | 0.01 | - |
| Mean | 4.46 | 7.00 | 3.86 | 3.73 | 26.79 | 24.25 | 18.34 |
| SD | 2.33 | 4.10 | 1.00 | 1.11 | 5.47 | 3.76 | 5.72 |

RS: reward sensitivity; PS: punishment sensitivity; IRI-EC: empathic concern; IRI-PT: perspective-taking; IRI-PD: personal distress.

**Supplemental Table 5. Parameters for hierarchical linear models in Study 2 including outliers.**

|  | Model 4 |
| --- | --- |
| Fixed | β (SE) |
| Age | 0.05 (0.02)** |
| Gender | 0.04 (0.02)** |
| SES | 0.03 (0.01)* |
| Type | 0.21 (0.21) |
| Perspective | 0.00 (0.01) |
| PS | 0.00 (0.02) |
| RS | -0.01 (0.02) |
| JS-Other | 0.06 (0.02)** |
| JS-Self | -0.04 (0.02) |
| IRI-EC | 0.08 (0.02)*** |
| IRI-PT | 0.01 (0.02) |
| IRI-PD | -0.03 (0.02)* |
| Type*PS | 0.01 (0.02) |
| Type*RS | -0.04 (0.02)* |
| Type*JS-Other | -0.06 (0.02)*** |
| Type*JS-Self | 0.04 (0.02)* |
| Random | Variance |
| Participant | 0.20 |
| Scenario | 1.82 |
| Residual | 2.27 |

Standardized weights and errors for fixed effect coefficients. RS: reward sensitivity; PS: punishment sensitivity; IRI-EC: empathic concern; IRI-PT: perspective-taking; IRI-PD: personal distress.

* *p*<.05, **** *p*<.01, *** *p*<.001.
